# Supplementary material for: Field-collected Triatoma sordida from central Brazil display high microbiota diversity that varies with regard to developmental stage and intestinal segmentation
Source: PubMed Central journal article supplement (PMC6138416; doi:10.1371/journal.pntd.0006709), 2018-08-23
Supplement: pntd.0006709.s001.pdf [file pntd.0006709.s001.pdf]

**Field-collected *Triatoma sordida* from central Brazil display high microbiota diversity that varies with regard to developmental stage and intestinal segmentation**

Short title: *Triatoma sordida* intestinal microbiota

Joana L. Oliveira<sup>1,4</sup>, Juliano C. Cury<sup>2</sup>, Rodrigo Gurgel-Gonçalves<sup>3</sup>, Ana C. Bahia<sup>4¶\*</sup>,

Fernando A. Monteiro<sup>1,5¶\*</sup>



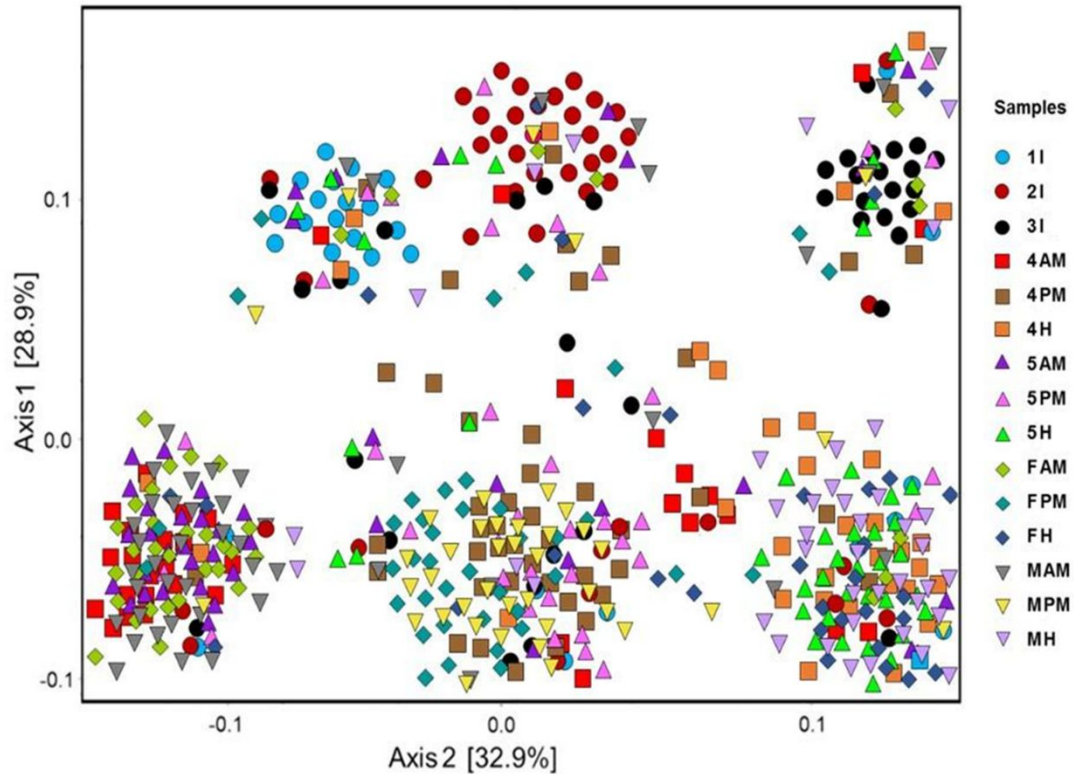

**S1 Appendix. Principal coordinate analysis (PCoA) of weighted-UniFrac distances comparing the bacterial communities of *T. sordida* intestine.** Weighted-UniFrac distances matrices were calculated for each sample using one representative sequence for each OTU (3%). Axes represent the greatest proportion of variances in the communities for each analysis. Samples analyzed: entire intestine of 1<sup>st</sup> stage nymphs (1I); entire intestine of 2<sup>nd</sup> stage nymphs (2I); entire intestine of 3<sup>rd</sup> stage nymphs (3I); anterior midgut of 4<sup>th</sup> stage nymphs (4AM); posterior midgut of 4<sup>th</sup> stage nymphs (4PM); hindgut of 4<sup>th</sup> stage nymphs (4H); anterior midgut of 5<sup>th</sup> stage nymphs (5AM); posterior midgut of 5<sup>th</sup> stage nymphs (5PM); hindgut of 5<sup>th</sup> stage nymphs (5H); anterior midgut of females (FAM); posterior midgut of females (FPM); hindgut of females (FH); anterior midgut of males (MAM); posterior midgut of males (MPM); hindgut of males (MH).

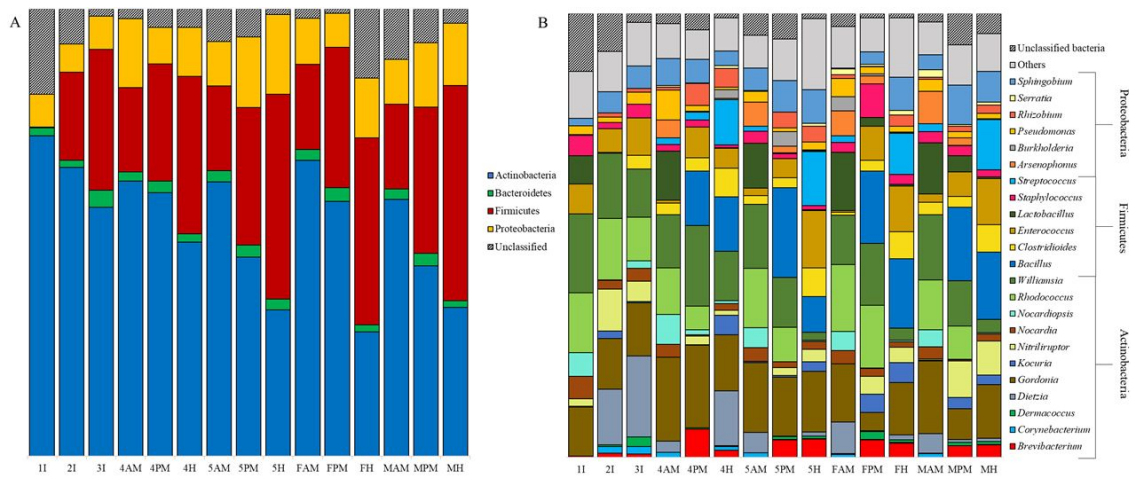

**S2 Appendix. Relative abundance of bacterial phyla (A) and genera (B) found in *T. sordida* intestinal microbiota.** Samples: entire intestine of 1<sup>st</sup> stage nymphs (1I); entire intestine of 2<sup>nd</sup> stage nymphs (2I); entire intestine of 3<sup>rd</sup> stage nymphs (3I); anterior midgut of 4<sup>th</sup> stage nymphs (4AM); posterior midgut of 4<sup>th</sup> stage nymphs (4PM); hindgut of 4<sup>th</sup> stage nymphs (4H); anterior midgut of 5<sup>th</sup> stage nymphs (5AM); posterior midgut of 5<sup>th</sup> stage nymphs (5PM); hindgut of 5<sup>th</sup> stage nymphs (5H); anterior midgut of females (FAM); posterior midgut of females (FPM); hindgut of females (FH); anterior midgut of males (MAM); posterior midgut of males (MPM); hindgut of males (MH).

**S2 Table. Field expedition data.** Number of collected specimens of *T. sordida* in three expeditions and positivity to *T. cruzi*.

| Specimens collected    | Field expeditions data |          |               |       | <i>T. cruzi</i> - infected |
|------------------------|------------------------|----------|---------------|-------|----------------------------|
|                        | December 2013          | May 2014 | November 2014 | Total |                            |
| 1 <sup>st</sup> instar | 2                      | 0        | 5             | 7     | 0                          |
| 2 <sup>nd</sup> instar | 8                      | 2        | 17            | 27    | 0                          |
| 3 <sup>rd</sup> instar | 5                      | 2        | 9             | 16    | 0                          |
| 4 <sup>th</sup> instar | 3                      | 14       | 5             | 22    | 0                          |
| 5 <sup>th</sup> instar | 7                      | 26       | 35            | 68    | 0                          |
| Females                | 20                     | 12       | 28            | 60    | 0                          |
| Males                  | 32                     | 35       | 37            | 104   | 0                          |
| Total                  | 77                     | 91       | 136           | 304   | 0                          |

**S3 Table. Coverage indices of *T. sordida* intestinal samples.** Good's coverage of 454 pyrosequencing for each sample ( $p < 0.05$ ) calculated with the Mothur program. Samples analyzed: entire intestine of 1<sup>st</sup> stage nymphs (1I); entire intestine of 2<sup>nd</sup> stage nymphs (2I); entire intestine of 3<sup>rd</sup> stage nymphs (3I); anterior midgut of 4<sup>th</sup> stage nymphs (4AM); posterior midgut of 4<sup>th</sup> stage nymphs (4PM); hindgut of 4<sup>th</sup> stage nymphs (4H); anterior midgut of 5<sup>th</sup> stage nymphs (5AM); posterior midgut of 5<sup>th</sup> stage nymphs (5PM); hindgut of 5<sup>th</sup> stage nymphs (5H); anterior midgut of females (FAM); posterior midgut of females (FPM); hindgut of females (FH); anterior midgut of males (MAM); posterior midgut of males (MPM); hindgut of males (MH).

| <b>Samples</b> | <b>Good's coverage (%)</b> |
|----------------|----------------------------|
| <b>1I</b>      | 93.76                      |
| <b>2I</b>      | 96.13                      |
| <b>3I</b>      | 96.84                      |
| <b>4AM</b>     | 97.02                      |
| <b>4PM</b>     | 97.14                      |
| <b>4H</b>      | 96.03                      |
| <b>5AM</b>     | 97.20                      |
| <b>5PM</b>     | 97.20                      |
| <b>5H</b>      | 97.32                      |
| <b>FAM</b>     | 96.44                      |
| <b>FPM</b>     | 95.49                      |
| <b>FH</b>      | 97.23                      |
| <b>MAM</b>     | 97.35                      |
| <b>MPM</b>     | 97.16                      |
| <b>MH</b>      | 97.41                      |

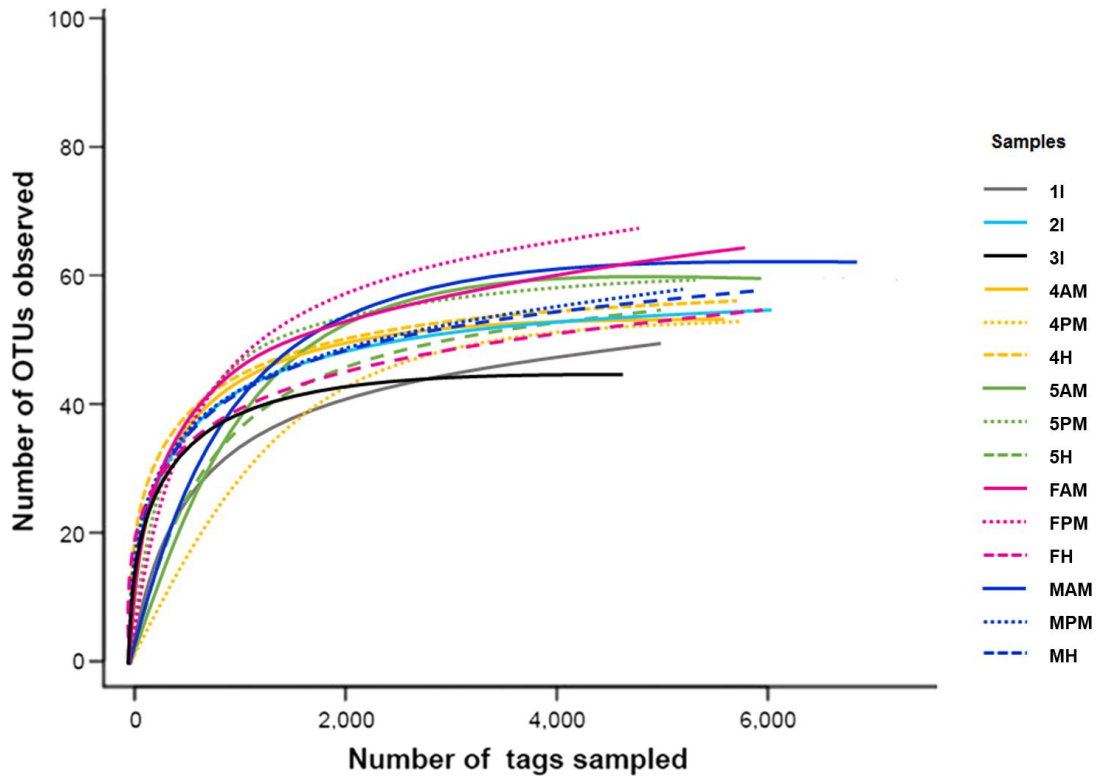

**S3 Appendix. Rarefaction curves of 16S rRNA sequences from intestinal segments of *T. sordida* samples.** Samples analyzed: entire intestine of 1<sup>st</sup> stage nymphs (1I); entire intestine of 2<sup>nd</sup> stage nymphs (2I); entire intestine of 3<sup>rd</sup> stage nymphs (3I); anterior midgut of 4<sup>th</sup> stage nymphs (4AM); posterior midgut of 4<sup>th</sup> stage nymphs (4PM); hindgut of 4<sup>th</sup> stage nymphs (4H); anterior midgut of 5<sup>th</sup> stage nymphs (5AM); posterior midgut of 5<sup>th</sup> stage nymphs (5PM); hindgut of 5<sup>th</sup> stage nymphs (5H); anterior midgut of females (FAM); posterior midgut of females (FPM); hindgut of females (FH); anterior midgut of males (MAM); posterior midgut of males (MPM); hindgut of males (MH).

**S4 Table. Richness and diversity indices for *T. sordida* intestinal microbiota in different intestinal segments.** OTUs were defined based on 97% identity cutoff. Samples analyzed: Anterior midgut (AM = 4\_AM+5\_AM+F\_AM+M\_AM); Posterior midgut (PM = 4\_PM+5\_PM+F\_AM+M\_AM); Hindgut (H = 4\_H+5H+F\_H+M\_H).

| <b>Samples</b> | <b>N° of observed OTUs</b> | <b>Chao1</b> | <b>Shannon</b> |
|----------------|----------------------------|--------------|----------------|
| <b>AM</b>      | 46                         | 47.5 ± 0.70  | 3.50 ± 0.75    |
| <b>PM</b>      | 35                         | 36.5 ± 0.50  | 3.25 ± 0.25    |
| <b>H</b>       | 33                         | 38.5 ± 1.50  | 2.30 ± 0.30    |



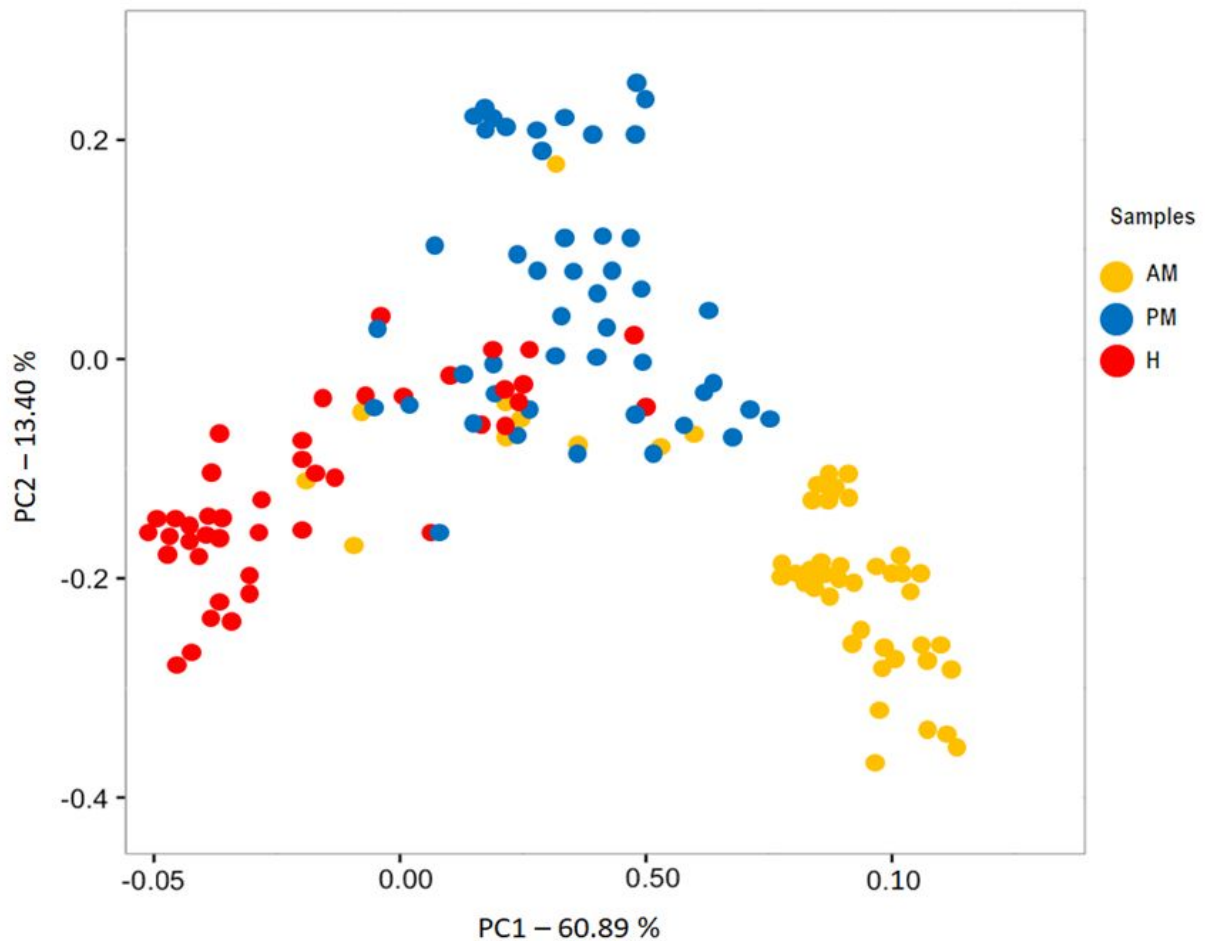

**S4 Appendix. Principal coordinate analysis (PCoA) of weighted-UniFrac distances comparing the bacterial communities of *T. sordida* intestinal segments.** Weighted-UniFrac distances matrices were calculated for each sample using one representative sequence for each OTU (3%). Axes represent the greatest proportion of variances in the communities for each analysis. Samples analyzed: Anterior midgut (AM = 4\_AM+5\_AM+F\_AM+M\_AM); Posterior midgut (PM = 4\_PM+5\_PM+F\_AM+M\_AM); Hindgut (H = 4\_H+5H+F\_H+M\_H).

**S5 Table. Analysis of similarity (ANOSIM) of the bacterial community of intestinal segments of *T. sordida*.** Corrected P-values (<0.025) were calculated using the Bonferroni method. Significant comparisons are shown in bold. Samples analyzed: Anterior midgut (AM = 4\_AM+5\_AM+F\_AM+M\_AM); Posterior midgut (PM = 4\_PM+5\_PM+F\_AM+M\_AM); Hindgut (H = 4\_H+5H+F\_H+M\_H).

|           | <b>AM</b> | <b>PM</b> | <b>H</b>      |
|-----------|-----------|-----------|---------------|
| <b>AM</b> | -         | 0.0357    | <b>0.0086</b> |
| <b>PM</b> |           | -         | <b>0.0054</b> |
| <b>H</b>  |           |           | -             |

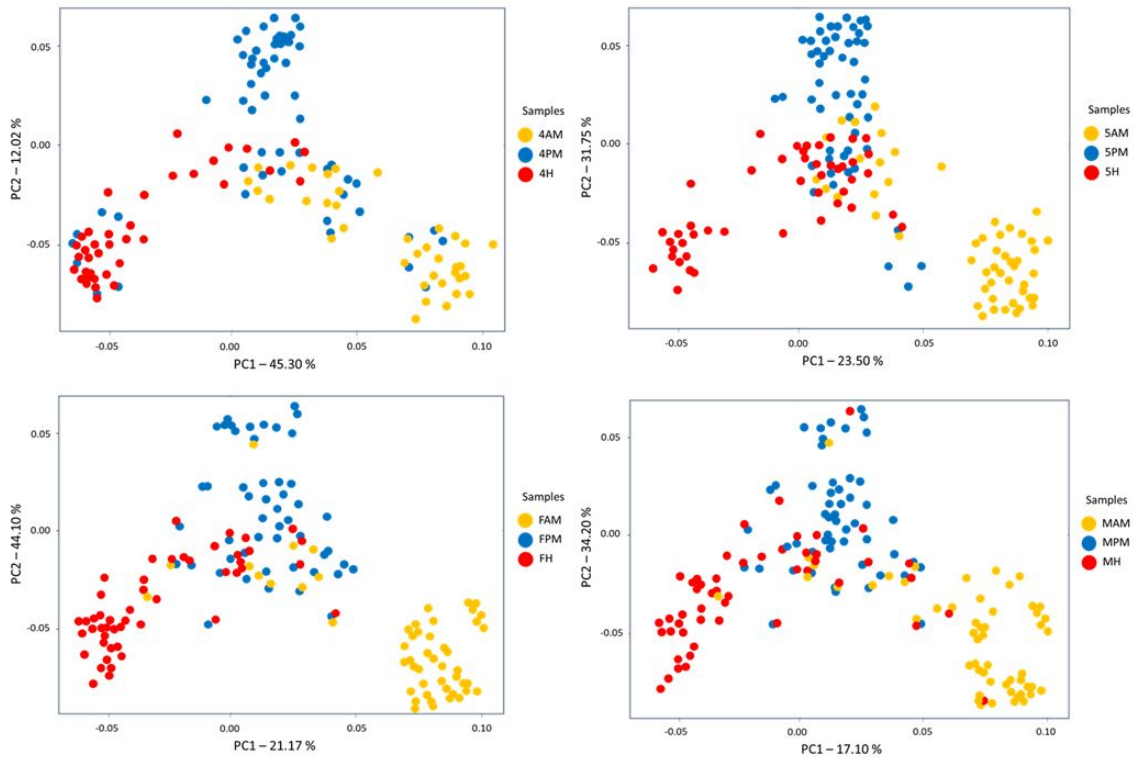

**S5 Appendix. Principal coordinate analysis (PCoA) of weighted-UniFrac distances comparing the bacterial communities of *T. sordida* intestine in different intestinal segments.** Weighted-UniFrac distances matrices were calculated for each sample using one representative sequence for each UTO (3%). Axes represent the greatest proportion of variances in the communities for each analysis. Samples analyzed: Anterior midgut of 4<sup>th</sup> stage nymphs (4AM); posterior midgut of 4<sup>th</sup> stage nymphs (4PM); hindgut of 4<sup>th</sup> stage nymphs (4H); anterior midgut of 5<sup>th</sup> stage nymphs (5AM); posterior midgut of 5<sup>th</sup> stage nymphs (5PM); hindgut of 5<sup>th</sup> stage nymphs (5H); anterior midgut of females (FAM); posterior midgut of females (FPM); hindgut of females (FH); anterior midgut of males (MAM); posterior midgut of males (MPM); hindgut of males (MH).

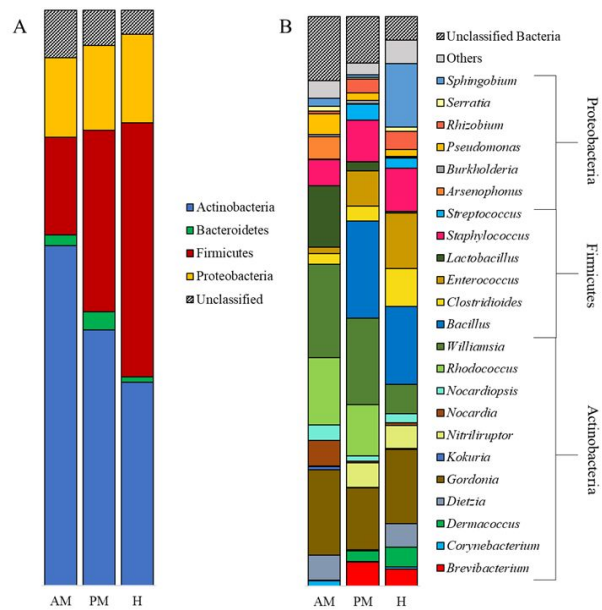

**S6 Appendix. Relative abundance of bacterial phyla (A) and genera (B) found in *T. sordida* intestinal microbiota.** Samples: anterior midgut of 4<sup>th</sup> instar, 5<sup>th</sup> instar, female and male (AM); posterior midgut of of 4<sup>th</sup> instar, 5<sup>th</sup> instar, female and male and hindgut of 4<sup>th</sup> instar, 5<sup>th</sup> instar, female and male (H). I = entire intestine. AM = anterior midgut, PM = posterior midgut, H = hindgut.
